# Supplementary material for: Ultra-precise ruler for ammonia nitrogen quantification in electrochemical synthesis experiments
Source: Royal Society of Chemistry journal article supplement (doi:10.1039/d4ay02288b), 2025-01-01
Supplement: d4ay02288b1.pdf [file d4ay02288b1.pdf]

## Supplementary Information

# Ultra-Precise Ruler for Ammonia Nitrogen Quantification in Electrochemical Synthesis Experiments

*Yao Hu,1# Donghui Wang,2#, Bo Hu,6# Haihui Lan,3\*, Wen Zhong,1 Qi Wang,2 Huicong Xia,4 Mingde Yao,5\* Mingqing Chen,1 Mingliang Du1\**

1 Key Laboratory of Synthetic and Biological Colloids, Ministry of Education, School of Chemical and Material Engineering, Jiangnan University, Wuxi, Jiangsu 214122, P. R. China.

2 School of Environmental and Ecology, Jiangnan University, Wuxi, Jiangsu 214122, PR China.

3 Department of Chemistry, Massachusetts Institute of Technology, Cambridge, Massachusetts 02139, United States.

4 College of Materials Science and Engineering, Zhengzhou University, 450001, P. R. Zhengzhou, China.

5 Department of Computer Science and Engineering, The Chinese University of Hong Kong, 999077, Hong Kong, P. R. China.

6 College of Arts and Sciences, University of Illinois Urbana-Champaign, Champaign, IL61801, United States.

**KEYWORDS:** Ammonia Nitrogen Quantification, Electrochemical Synthesis, Nitrate Reduction Reaction, Ultra-Precise Ruler, Algorithm optimization.

# These authors contributed equally to this work.

## Contents

|                                                                                                                                                                   |    |
|-------------------------------------------------------------------------------------------------------------------------------------------------------------------|----|
| Supplementary Information .....                                                                                                                                   | 1  |
| Ultra-Precise Ruler for Ammonia Nitrogen Quantification in Electrochemical Synthesis Experiments ..                                                               | 1  |
| 1. Detection of NH <sub>3</sub> using indophenol blue method under various 0.02 mM metal ions.....                                                                | 3  |
| 2. Calibration curves for NH <sub>3</sub> detection using the indophenol blue method under various pH.....                                                        | 4  |
| 3. Absorbance and wavelength of NH <sub>3</sub> detection using the indophenol blue method under various pH ...                                                   | 5  |
| 4. Detection of NH <sub>3</sub> detection using the indophenol blue method under various pH .....                                                                 | 6  |
| 5. Calibration curves for NH <sub>3</sub> detection using the indophenol blue method under different concentrations of KNO <sub>3</sub> .....                     | 7  |
| 7. Detection of NH <sub>3</sub> using indophenol blue method under different concentrations of KNO <sub>3</sub> .....                                             | 9  |
| 8. Calibration curves for NH <sub>3</sub> detection using the indophenol blue method under different concentrations of K <sub>2</sub> SO <sub>4</sub> .....       | 10 |
| 9. Absorbance and wavelength of NH <sub>3</sub> detection using the indophenol blue method under different concentrations of K <sub>2</sub> SO <sub>4</sub> ..... | 11 |
| 10. Detection of NH <sub>3</sub> using indophenol blue method under different concentrations of K <sub>2</sub> SO <sub>4</sub> .....                              | 12 |

**1. Detection of NH<sub>3</sub> using indophenol blue method under various 0.02 mM metal ions**

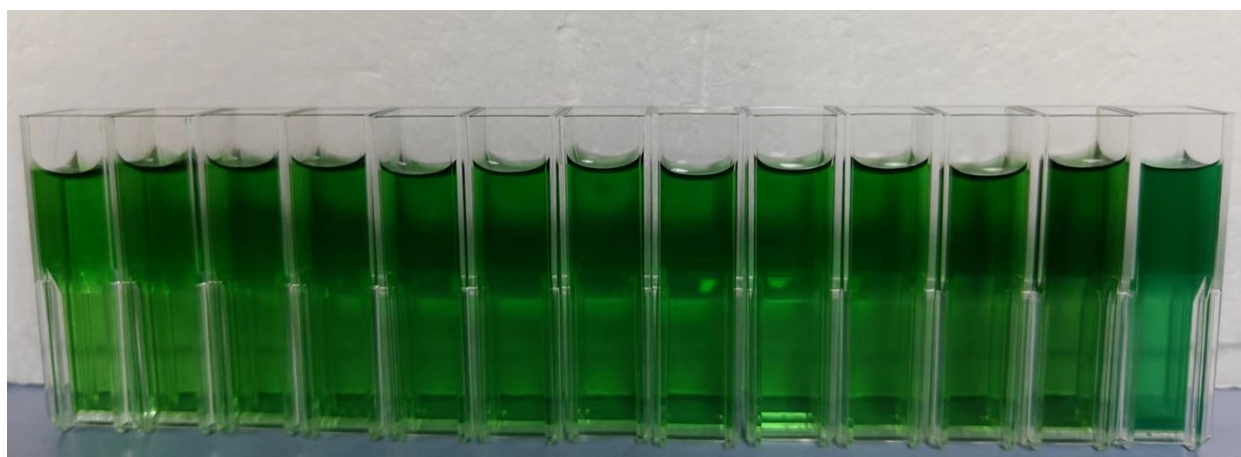

**Supplementary Figure 1 | Detection of NH<sub>3</sub> using indophenol blue method under various 0.02 mM metal ions.**

## 2. Calibration curves for NH<sub>3</sub> detection using the indophenol blue method under various pH

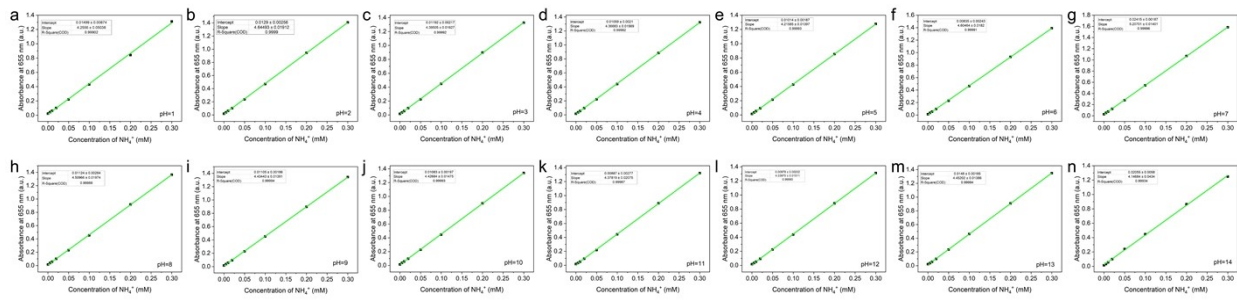

Supplementary Figure 2 | Calibration curves for NH<sub>3</sub> detection using the indophenol blue method under a) pH 1, b) pH 2, c) pH 3, d) pH 4, e) pH 5, f) pH 6, g) pH 7, h) pH 8, i) pH 9, j) pH 10, k) pH 11, l) pH 12, m) pH 13, n) pH 14.

### 3. Absorbance and wavelength of NH<sub>3</sub> detection using the indophenol blue method under various pH

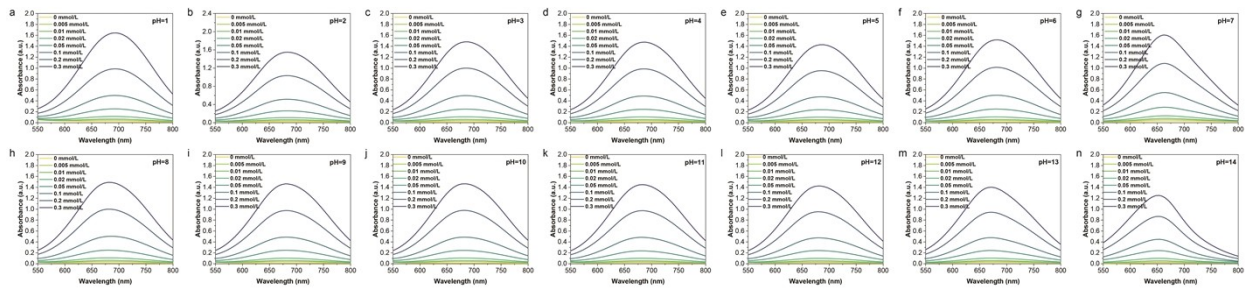

Supplementary Figure 3 | Absorbance and wavelength of NH<sub>3</sub> detection using the indophenol blue method under a) pH 1, b) pH 2, c) pH 3, d) pH 4, e) pH 5, f) pH 6, g) pH 7, h) pH 8, i) pH 9, j) pH 10, k) pH 11, l) pH 12, m) pH 13, n) pH 14.

#### 4. Detection of $\text{NH}_3$ detection using the indophenol blue method under various pH

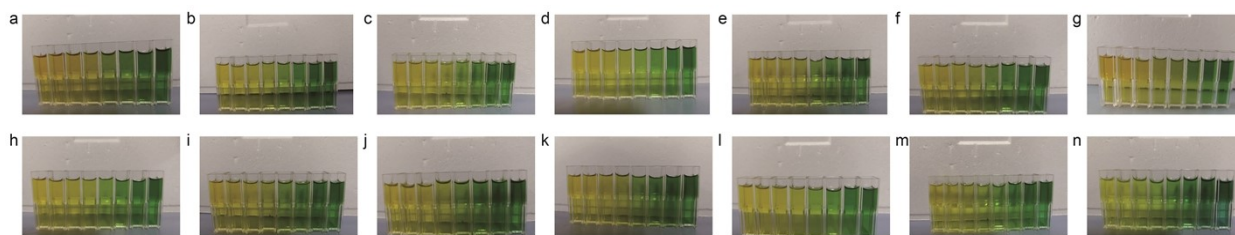

**Supplementary Figure 4 | Detection of  $\text{NH}_3$  detection using the indophenol blue method under**

a) pH 1, b) pH 2, c) pH 3, d) pH 4, e) pH 5, f) pH 6, g) pH 7, h) pH 8, i) pH 9, j) pH 10, k) pH 11, l) pH 12, m) pH 13, n) pH 14.

## 5. Calibration curves for NH<sub>3</sub> detection using the indophenol blue method under different concentrations of KNO<sub>3</sub>

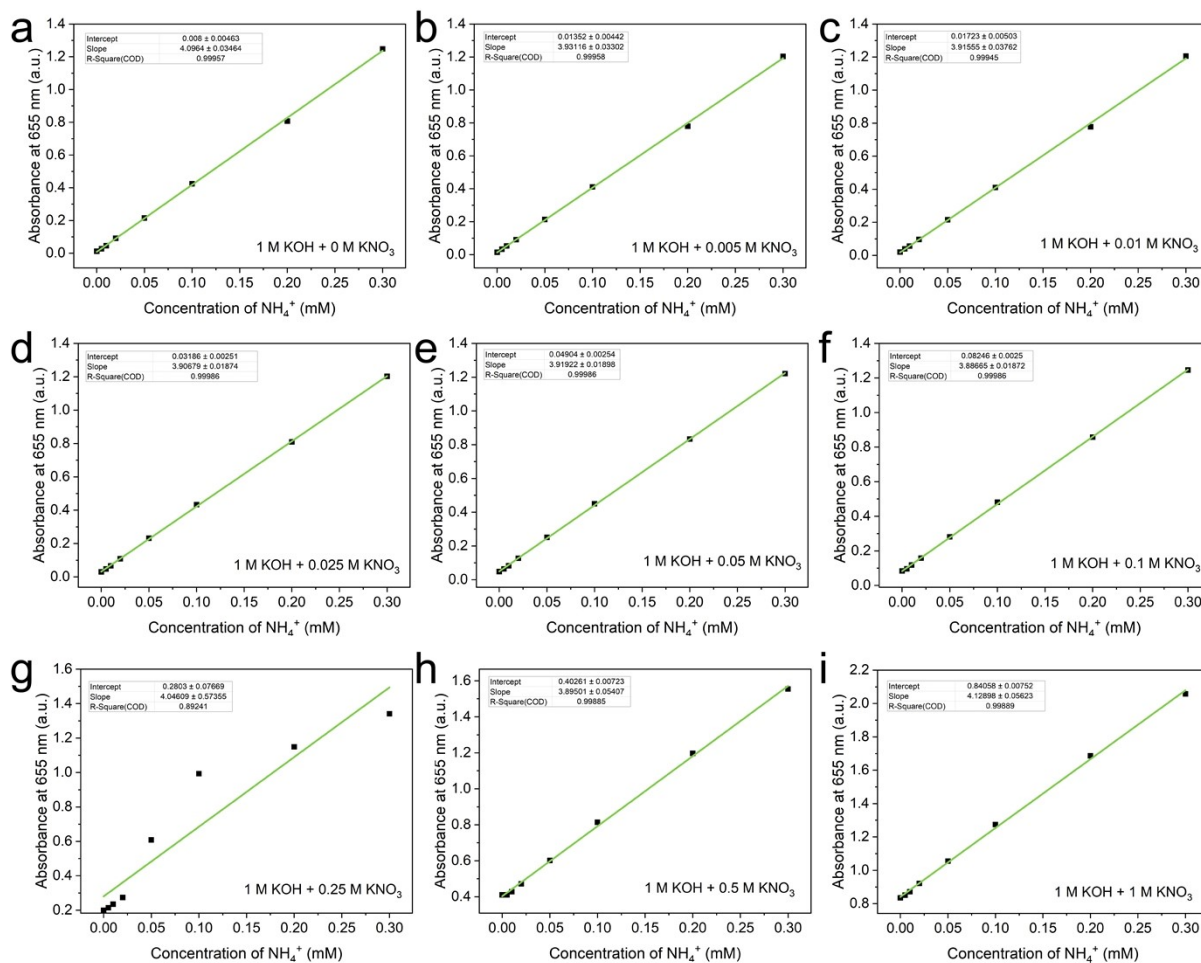

Supplementary Figure 5 | Calibration curves for NH<sub>3</sub> detection using the indophenol blue method under a) 0 M, b) 0.005 M, c) 0.01 M, d) 0.025 M, e) 0.05 M, f) 0.1 M, g) 0.25 M, h) 0.5 M, i) 1 M KNO<sub>3</sub>.

## 6. Absorbance and wavelength of $\text{NH}_3$ detection using the indophenol blue method under different concentrations of $\text{KNO}_3$

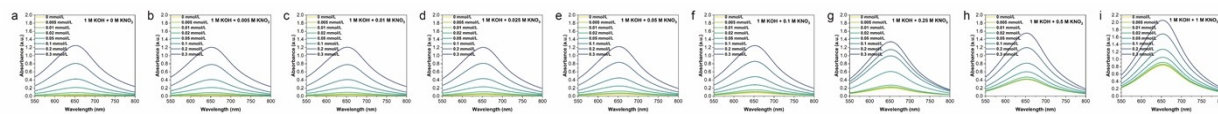

**Supplementary Figure 6 | Absorbance and wavelength of  $\text{NH}_3$  detection using the indophenol blue method under a) 0 M, b) 0.005 M, c) 0.01 M, d) 0.025 M, e) 0.05 M, f) 0.1 M, g) 0.25 M, h) 0.5 M, i) 1 M  $\text{KNO}_3$ .**



## 7. Detection of $\text{NH}_3$ using indophenol blue method under different concentrations of $\text{KNO}_3$

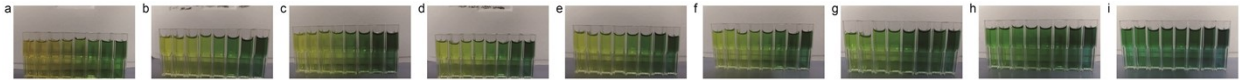

**Supplementary Figure 7 | Detection of  $\text{NH}_3$  using indophenol blue method under a) 0 M, b) 0.005 M, c) 0.01 M, d) 0.025 M, e) 0.05 M, f) 0.1 M, g) 0.25 M, h) 0.5 M, i) 1 M  $\text{KNO}_3$ .**

## 8. Calibration curves for NH<sub>3</sub> detection using the indophenol blue method under different concentrations of K<sub>2</sub>SO<sub>4</sub>

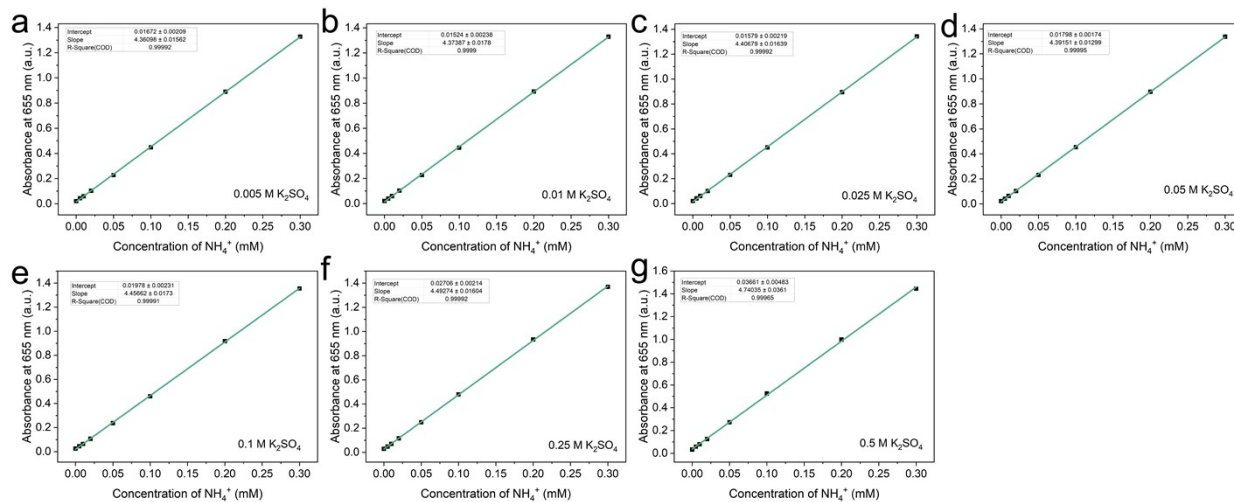

Supplementary Figure 8 | Absorbance and wavelength of NH<sub>3</sub> detection using the indophenol blue method under a) 0.005 M, b) 0.01 M, c) 0.025 M, d) 0.05 M, e) 0.1 M, f) 0.25 M, g) 0.5 M K<sub>2</sub>SO<sub>4</sub>.

## 9. Absorbance and wavelength of NH<sub>3</sub> detection using the indophenol blue method under different concentrations of K<sub>2</sub>SO<sub>4</sub>

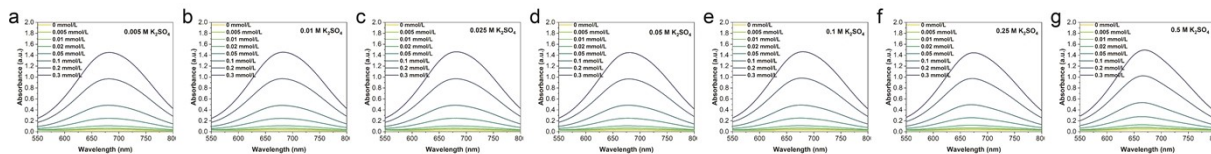

Supplementary Figure 9 | Absorbance and wavelength of NH<sub>3</sub> detection using the indophenol blue method under a) 0.005 M, b) 0.01 M, c) 0.025 M, d) 0.05 M, e) 0.1 M, f) 0.25 M, g) 0.5 M K<sub>2</sub>SO<sub>4</sub>.

## 10. Detection of $\text{NH}_3$ using indophenol blue method under different concentrations of $\text{K}_2\text{SO}_4$

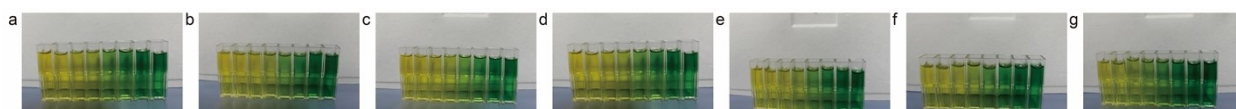

**Supplementary Figure 10 | Detection of  $\text{NH}_3$  using indophenol blue method under a) 0.005 M, b) 0.01 M, c) 0.025 M, d) 0.05 M, e) 0.1 M, f) 0.25 M, g) 0.5 M  $\text{K}_2\text{SO}_4$ .**
